# Supplementary material for: 4MBA-labeled Ag-nanorod aggregates coated with SiO2: synthesis, SERS activity, and biosensing applications
Source: Royal Society of Chemistry journal article supplement (doi:10.1039/c5ay01886b), 2015-01-01
Supplement: c5ay01886b1.pdf [file c5ay01886b1.pdf]

## Supporting Information

# 4MBA-labeled Ag-nanorod aggregates by coated with SiO<sub>2</sub>: synthesis, SERS activity, and biosensing application

Wei Lai,<sup>a</sup> Jun Zhou,<sup>\*a</sup> Yanting Liu,<sup>a</sup> Zhenhong Jia,<sup>b</sup> Shushen Xie,<sup>c</sup> Lucia Petti<sup>d</sup> and  
Pasquale Mormile<sup>d</sup>

<sup>a</sup> *Institute of Photonics, Faculty of Science, Ningbo University, Ningbo, 315211, Zhejiang, China. Tel: +86-574-87600794, Fax: +86-574-87600744,*

*\*corresponding author E-mail: zhoujun@nbu.edu.cn*

<sup>b</sup> *School of Information Science and Engineering, Xinjiang University, Urumqi, 830046, China.*

<sup>c</sup> *Key Laboratory of Optoelectronic Science & Technology for Medicine of Ministry of Education, Fujian Normal University, Fuzhou, 350007, Fujian, China.*

<sup>d</sup> *Institute of Cybernetics “E. Caianello” of CNR, Via Campi Flegrei 34, 80072, Pozzuoli, Italy.*

### The immunoassay protocol

To visually describe the immunoassay protocol, the schematic representation of immunoassay protocol was plotted in Fig. S1. As shown in Fig. S1, the immune probe is firstly prepared by the chemical reduction process from Ag seed to Ag NRs with the help of CTAB; then, the as-prepared Ag NRs are labeled with 4MBA molecules; subsequently, the silica shell is successfully coated on the surface of Ag NRs aggregate to form 4MBA-Ag NRs@SiO<sub>2</sub>, and the anti-PSA antibody is immobilized on the surface of silica. Meanwhile, the immune substrate is fabricated by immobilizing Ag NRs on the quartz slide and anti-PSA antibody on the surface of Ag NRs and the naked surface of substrate is blocked by BSA. Finally, a sandwich structure is consisted of the immune probe, PSA and the immune substrate. After going through a series of washing step, the sandwich structure was tested by using Raman spectrometer to obtain the SERS spectra of 4MBA with different concentrations of PSA.

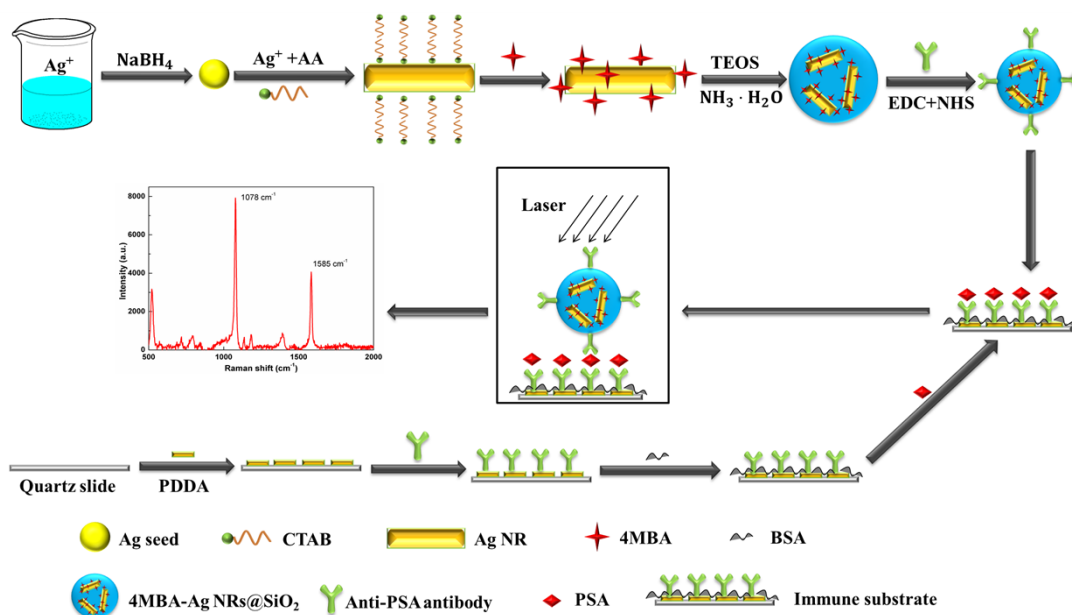

Fig. S1 Schematic representation of the immunoassay protocol

## High sensitive immunoassay

According to the immunoassay protocol described in this paper, the immunoassay experiments have been performed for different PSA concentrations. In Tab. S1, the experimental results including the standard error and the confidence intervals ( $\alpha=0.05$ ) were provided. It can be seen that the SERS intensity of 4MBA at  $1078\text{ cm}^{-1}$  have a significant decrease with the decreasing concentration of PSA and the limit of detection of PSA arrived  $0.3\text{ fg}\cdot\text{ml}^{-1}$  ( $8.824\times 10^{-18}\text{ mol/L}$ ).

Tab. S1 Statistic data for peak intensity at  $1078\text{ cm}^{-1}$  with different concentrations of PSA

| Concentration of PSA                      | Intensity of peak at $1078\text{ cm}^{-1}$ | Standard error | Confidence intervals |              |
|-------------------------------------------|--------------------------------------------|----------------|----------------------|--------------|
|                                           |                                            |                | Lower limit          | Upper limit  |
| $3\text{ }\mu\text{g}\cdot\text{ml}^{-1}$ | 17521.51                                   | 2681.86836     | 15311.79392          | 25296.16808  |
| $30\text{ ng}\cdot\text{ml}^{-1}$         | 13441.62                                   | 532.0856       | 12671.861            | 14264.199    |
| $0.3\text{ ng}\cdot\text{ml}^{-1}$        | 11111.6986                                 | 1338.693       | 9966.899             | 13285.761    |
| $3\text{ pg}\cdot\text{ml}^{-1}$          | 6936.79252                                 | 1456.65826     | 5808.286447          | 7913.945553  |
| $30\text{ fg}\cdot\text{ml}^{-1}$         | 2535.514                                   | 417.6668       | 2326.1022            | 2843.8378    |
| $3\text{ fg}\cdot\text{ml}^{-1}$          | 1538.49048                                 | 176.5036       | 1242.2519            | 1641.0441    |
| $0.3\text{ fg}\cdot\text{ml}^{-1}$        | 1067.04695                                 | 81.43581       | 1093.0934863         | 1194.0405137 |

## SERS active of the samples

In order to verify the reliability of SERS measurements, the repetitive experiments were carried out for three types of 4MBA-Ag NRs@SiO<sub>2</sub> samples (Type I, II and III) and the results were shown in Fig. S2. Each type of samples were consisted of 5

samples and prepared with the conditions of 0.02, 0.05 and 0.08 M CTAB, respectively. As shown in Fig. S2, the SERS spectra of each type of samples are almost same in 5 independent measurements, but there are considerable differences in their intensity of SERS signals for the different type of samples. It can be seen that, comparing Fig. S2(b) with Fig. S2(a) and (c), the second type of samples exhibit a stronger SERS signal, which is consistent with their EF values calculated by using Eq. 1 in this paper. It can be concluded that the as-synthesized 4MBA-Ag NRs@SiO<sub>2</sub> exhibits excellent SERS performance with a good repeatability.

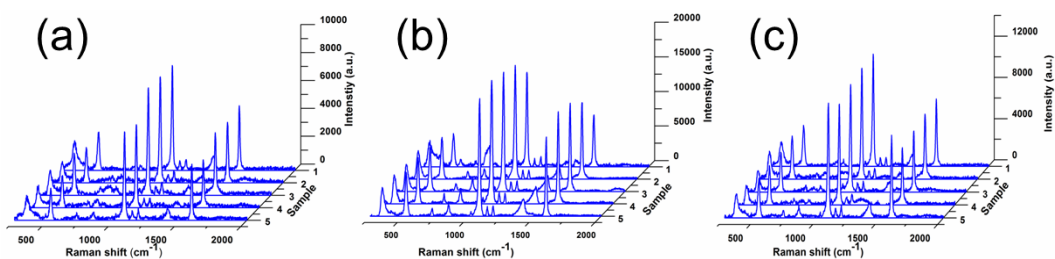

**Fig. S2** SERS spectra of three types of 4MBA-Ag NRs@SiO<sub>2</sub> samples.

(a) Type I, (b) Type II, and (c) Type III
